# Supplementary material for: The Nutritional and Pharmacological Potential of New Australian Thraustochytrids Isolated from Mangrove Sediments
Source: PubMed Central journal article supplement (PMC7142457; doi:10.3390/md18030151), 2020-03-06
Supplement: marinedrugs-18-00151-s001.pdf [file marinedrugs-18-00151-s001.pdf]

SUPPLEMENTARY DATA

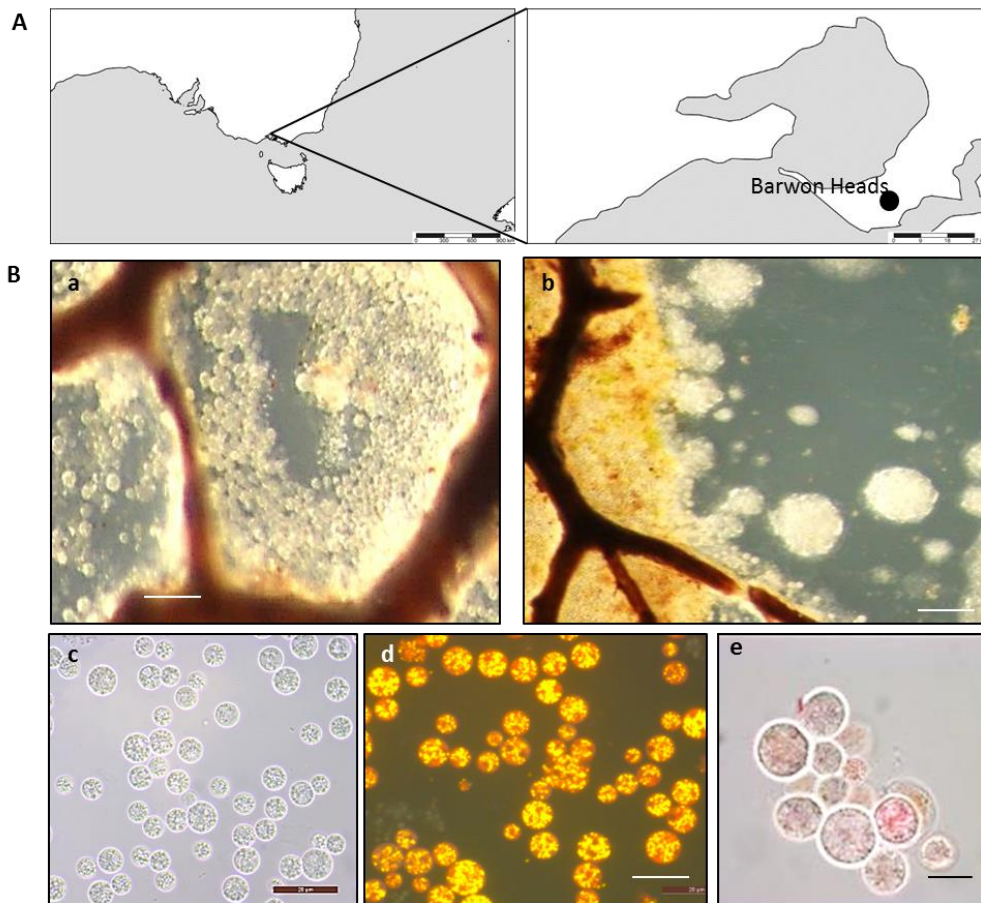

**Figure S1**

**Fig. S1**

A. Distribution of sampling sites in the mangrove habitats of Australia.

B. Microscopic analysis of thraustochytrids strains

Thraustochytrid cells were grown in mangrove leaves (a, b); Purified thraustochytrid cells (c) stained with Nile Red for lipid detection (d, yellow dots); Thraustochytrid cells with accumulated carotenoids (e). a-c, e: bright-field images; (d) fluorescent microscopy. Scale bars: a: 5cm; b: 1cm; c-e: 20  $\mu$ m.

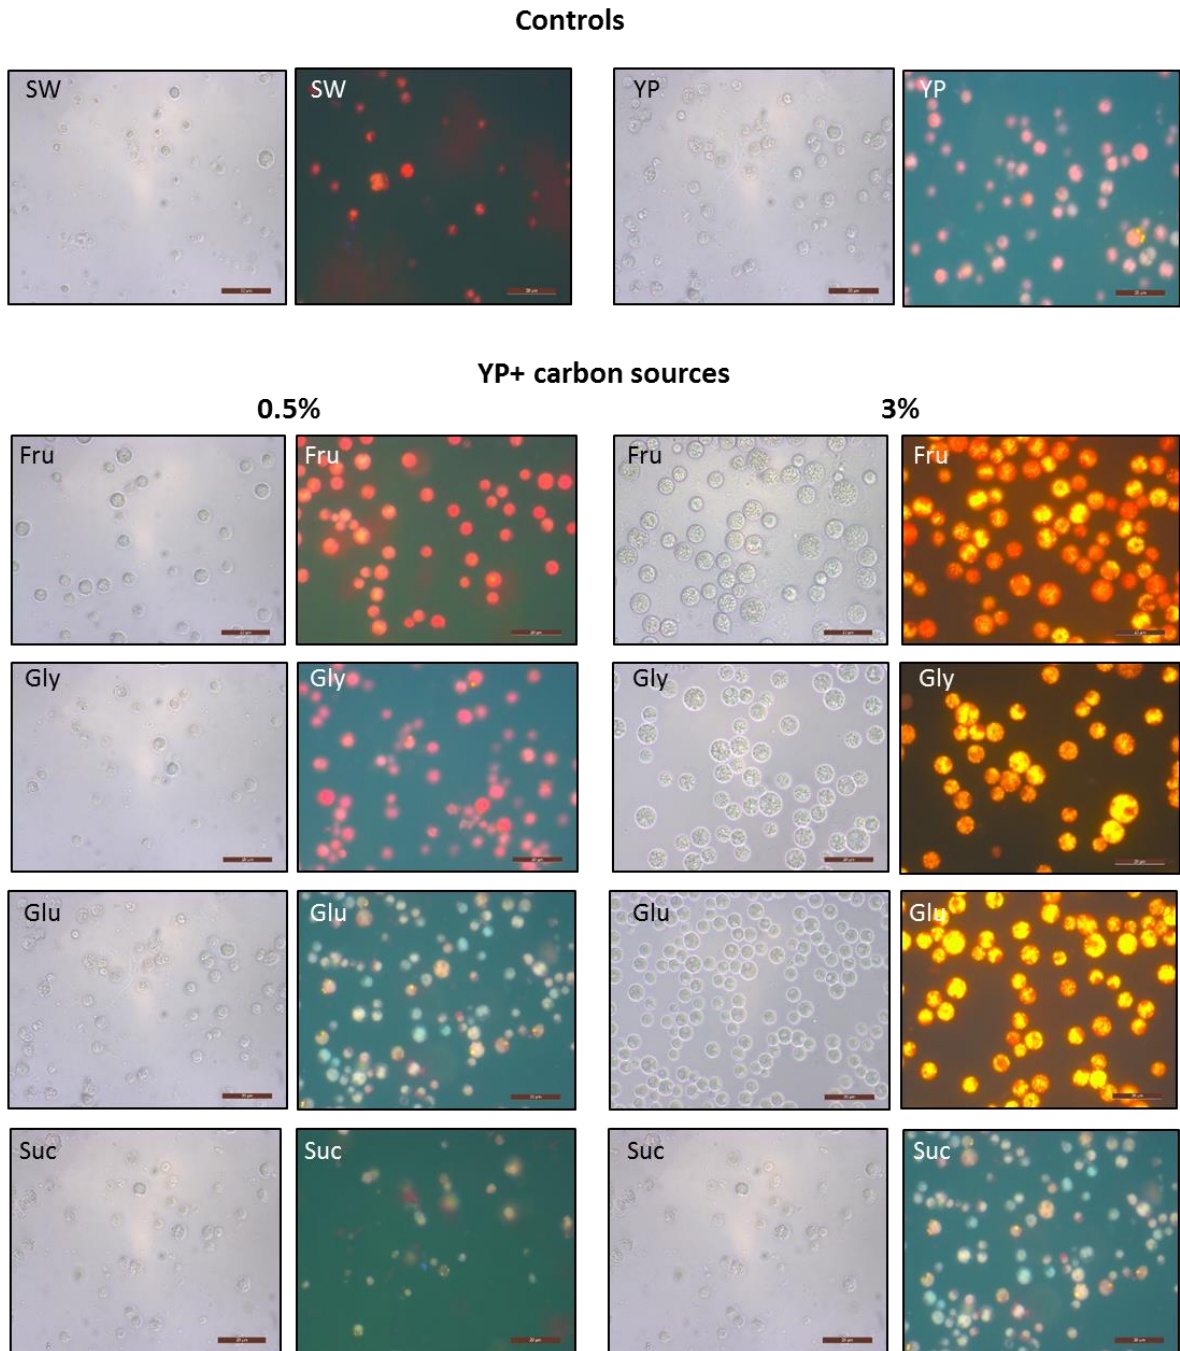

**Figure S2**

**Fig. S2.** Microscopic analysis of thraustochytrids cells grown on different carbon sources. Bright-field and fluorescent microscopy of cells grown on seawater alone (SW) and YP media and carbon sources: 0.5% and 3% of glucose (Glu); glycerol (Gly); fructose (Fru); sucrose (Suc). Cells were stained for lipids with Nile Red. Scale bars: 20  $\mu\text{m}$ .

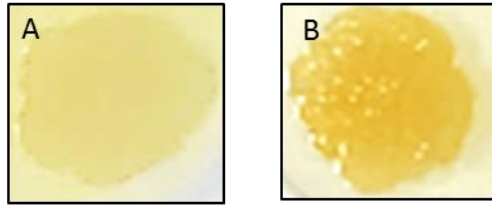

**Figure S3**

**Fig. S3.** Carotenoids production in thraustochytrids cells  
A: MAN65; B: MAN70

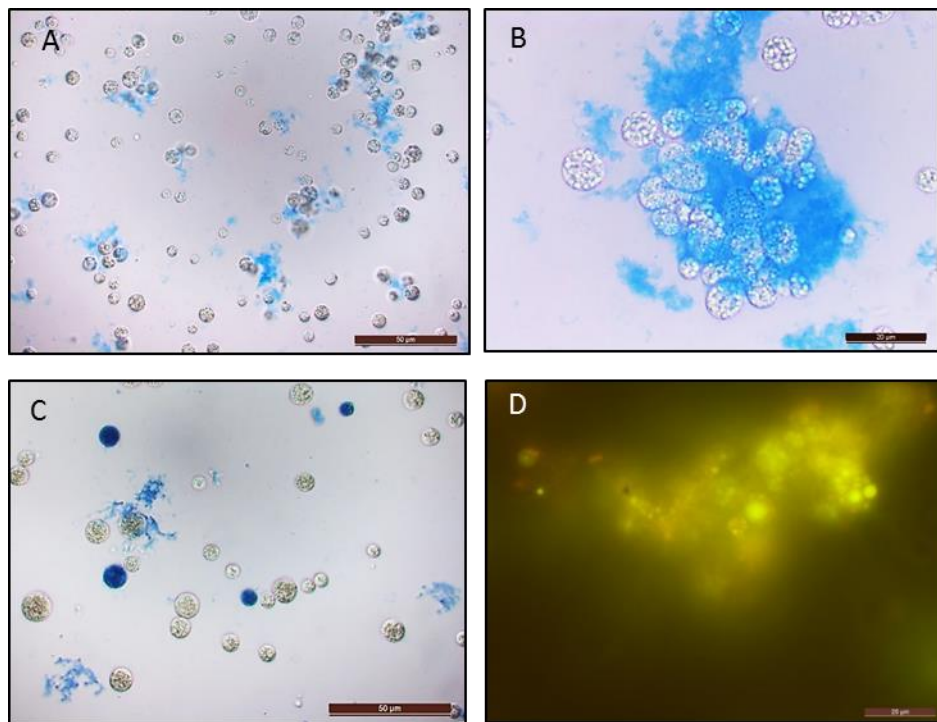

**Figure S4**

**Fig S4.** EPS accumulation in supernatant

A and B: EPS stained with 1% Alcian Blue; C: protein accumulation in EPS (staining with Amido Black); D: lipid accumulation in EPS (staining with Nile Red). Scale bars: A, C: 50  $\mu\text{M}$ ; B,D: 20  $\mu\text{M}$ . A-C: bright-field microscopy. D: fluorescent microscopy.

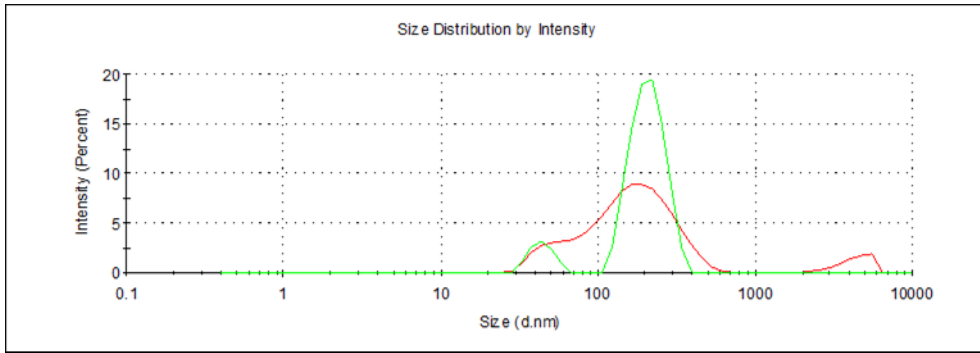

— pH7 — pH8

**Figure S5**

**Fig. S5:** Particle size distribution in aqueous emulsion at pH 7 and 8.

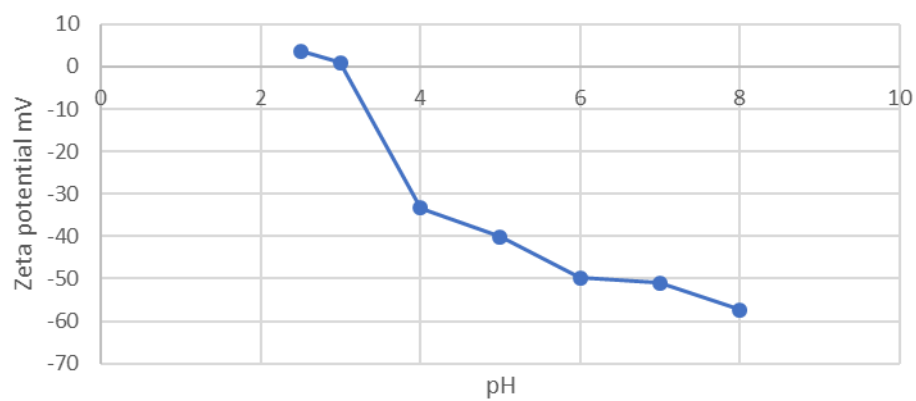

**Figure S6**

**Fig. S6:** Dependence of the particle electrical charge (zeta-potential) of extracted oil bodies on pH.
